# Supplementary material
Source: PubMed Central journal article supplement (PMC3074582)
Supplement: NIHMS253737-supplement-1_si_001.pdf [file NIHMS253737-supplement-1_si_001.pdf]

## Supporting Information

### **Antitumor Agents 286. Design, Synthesis and Structure-Activity Relationship of 3'*R*,4'*R*- Disubstituted-2',2'-dimethyldihydropyrano[2,3-*f*]chromone (DSP) Analogs as Potent Chemosensitizers to Overcome Multidrug Resistance**

Ting Zhou,<sup>†</sup> Qian Shi,<sup>†</sup> Kenneth F. Bastow<sup>‡\*</sup>, Kuo-Hsiung Lee<sup>\*†§</sup>

#### **Content**

|                                                                     |    |
|---------------------------------------------------------------------|----|
| HPLC conditions and summary of HPLC purity data for final compounds | S2 |
| Statistical analysis for cell assays                                | S3 |

### HPLC analysis of the final compounds.

Compound purities were determined by HPLC.

System: Shimadzu LC-20AT prominence liquid chromatography

Detector: Shimadzu SPD-M20A at 254 nm

Column: Alltima 2.1mm x 100 mm C18 3u

| <b>Compounds</b> | <b>Flow rate<br/>(mL/min)</b> | <b>CH<sub>3</sub>CN%</b> | <b>Purity</b> | <b>Retention time (min)</b> |
|------------------|-------------------------------|--------------------------|---------------|-----------------------------|
| <b>5</b>         | 0.2                           | 70                       | 100.0         | 12.75                       |
| <b>6</b>         | 0.2                           | 80                       | 96.8          | 4.27                        |
| <b>7</b>         | 0.2                           | 70                       | 96.1          | 8.39                        |
| <b>8</b>         | 0.2                           | 70                       | 99.8          | 24.37                       |
| <b>9</b>         | 0.2                           | 50                       | 97.3          | 11.66                       |
| <b>10</b>        | 0.2                           | 60                       | 99.6          | 15.18                       |
| <b>11</b>        | 0.2                           | 80                       | 100.0         | 11.28                       |
| <b>12</b>        | 0.2                           | 80                       | 99.9          | 18.38                       |
| <b>13</b>        | 0.2                           | 80                       | 96.7          | 11.85                       |
| <b>14</b>        | 0.2                           | 80                       | 96.1          | 6.70                        |
| <b>15</b>        | 0.2                           | 80                       | 99.1          | 4.51                        |
| <b>16</b>        | 0.2                           | 70                       | 100.0         | 9.84                        |
| <b>17</b>        | 0.2                           | 70                       | 95.2          | 11.28                       |
| <b>18</b>        | 0.2                           | 70                       | 96.0          | 4.07                        |
| <b>19</b>        | 0.2                           | 75                       | 99.5          | 19.00                       |
| <b>20</b>        | 0.2                           | 70                       | 99.8          | 19.66                       |
| <b>21</b>        | 0.2                           | 70                       | 98.8          | 17.13                       |

|           |     |    |       |       |
|-----------|-----|----|-------|-------|
| <b>22</b> | 0.2 | 70 | 99.0  | 4.36  |
| <b>23</b> | 0.2 | 70 | 97.8  | 11.25 |
| <b>24</b> | 0.2 | 70 | 99.9  | 11.85 |
| <b>25</b> | 0.2 | 70 | 100.0 | 7.32  |
| <b>26</b> | 0.2 | 70 | 99.9  | 22.15 |
| <b>27</b> | 0.2 | 70 | 99.3  | 4.97  |
| <b>28</b> | 0.2 | 70 | 100   | 9.98  |

**Statistic analysis for cell assays**

| <b>Compound</b> | <b>GI<sub>50</sub> of VCR + (1 <math>\mu</math>g/mL)<br/>indicated compound<br/>(<math>\mu</math>g/mL)</b> | <b>Compound</b>  | <b>GI<sub>50</sub> of VCR +(1 <math>\mu</math>g/mL)<br/>indicated compound<br/>(<math>\mu</math>g/mL)</b> |
|-----------------|------------------------------------------------------------------------------------------------------------|------------------|-----------------------------------------------------------------------------------------------------------|
| <b>5</b>        | >0.2                                                                                                       | <b>17</b>        | 0.03 $\pm$ 0.005                                                                                          |
| <b>6</b>        | >0.2                                                                                                       | <b>18</b>        | 0.071 $\pm$ 0.014                                                                                         |
| <b>7</b>        | 0.087 $\pm$ 0.016                                                                                          | <b>19</b>        | 0.023 $\pm$ 0.004                                                                                         |
| <b>8</b>        | >0.2                                                                                                       | <b>20</b>        | 0.011 $\pm$ 0.003                                                                                         |
| <b>9</b>        | 0.09 $\pm$ 0.012                                                                                           | <b>21</b>        | 0.0085 $\pm$ 0.001                                                                                        |
| <b>10</b>       | 0.0152 $\pm$ 0.004                                                                                         | <b>22</b>        | 0.060 $\pm$ 0.008                                                                                         |
| <b>11</b>       | 0.007 $\pm$ 0.0003                                                                                         | <b>23</b>        | >0.2                                                                                                      |
| <b>12</b>       | 0.12 $\pm$ 0.042                                                                                           | <b>24</b>        | >0.2                                                                                                      |
| <b>13</b>       | 0.15 $\pm$ 0.04                                                                                            | <b>25</b>        | 0.021 $\pm$ 0.01                                                                                          |
| <b>14</b>       | 0.0095 $\pm$ 0.003                                                                                         | <b>26</b>        | >0.2                                                                                                      |
| <b>15</b>       | 0.013 $\pm$ 0.002                                                                                          | <b>27</b>        | 0.098 $\pm$ 0.001                                                                                         |
| <b>16</b>       | 0.012 $\pm$ 0.004                                                                                          | <b>28</b>        | 0.11 $\pm$ 0.28                                                                                           |
|                 |                                                                                                            | <b>Verapamil</b> | 0.017 $\pm$ 0.004                                                                                         |

Mean GI<sub>50</sub> ( $\mu$ g/mL)  $\pm$  SD
